# Supplementary material for: Ultra-high-resolution photon-counting detector CT in evaluating coronary stent patency: a comparison to invasive coronary angiography
Source: PubMed Central journal article supplement (PMC11213791; doi:10.1007/s00330-023-10516-3), 2024-01-04
Supplement: 330_2023_10516_MOESM1_ESM.pdf [file 330_2023_10516_MOESM1_ESM.pdf]

**Ultra-high-resolution photon-counting detector  
CT in evaluating coronary stent patency: a  
comparison to invasive coronary angiography**

**Electronic Supplementary Material (ESM)**

**Supplementary Table 1:** Technical parameters for ultra-high-resolution photon-counting detector CT-angiography

| <b>Technical parameters</b> | <b>Values</b>                                              |
|-----------------------------|------------------------------------------------------------|
| Scan mode                   | ECG-synchronized retrospective spiral CTA                  |
| z-coverage                  | 120 x 0.2 mm                                               |
| Spatial resolution          | 0.11 mm in-plane                                           |
| Gantry rotation time        | 250 ms                                                     |
| Pitch                       | Depending on the patient's heart rate, preset at 0.2       |
| Spectral information        | Not available at ultra-high-resolution scan                |
| Dose modulation             | ECG-pulsing set at 15 – 80 % of the R–R interval           |
| Tube voltage                | Automatically determined (Care kV), either 120kV or 140 kV |
| Tube current                | Automatic tube current modulation (CareDose mAs)           |

Abbreviations: *ECG* electrocardiogram, *CTA* computed tomography angiography, *R–R interval* time elapsed between two consecutive R waves of a patient's electrocardiogram.

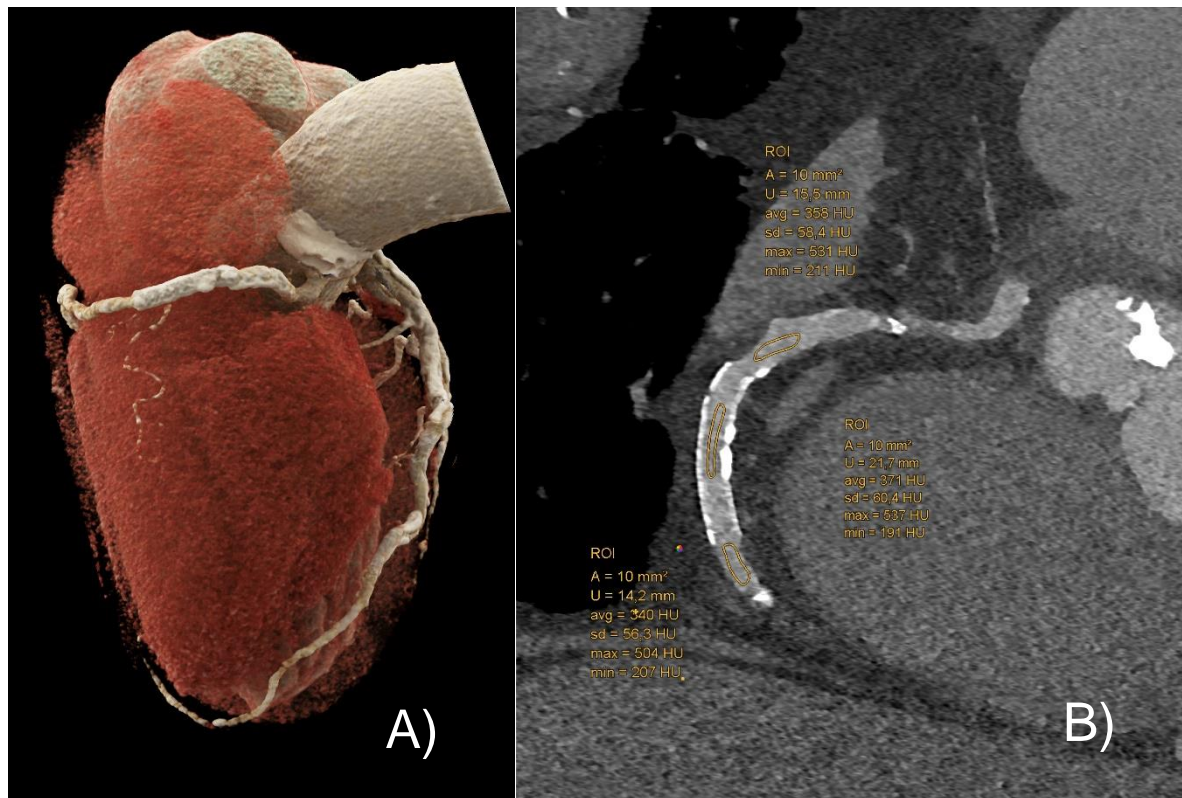

**Supplementary Figure 1.** Ultra-high-resolution photon-counting CT-angiography of an 85-year-old patient with previous stent implantation in the right coronary artery. A: Three-dimensional cinematic rendering showing the stent in segment 2 of the right coronary artery (RCA). B: Multiplanar reformation of the right coronary artery.

To quantify the stent-induced effect on the in-stent lumen attenuation ( $\Delta HU_{in\_stent}$ ), manually drawn regions of interest (ROI) are placed in the stent lumen ( $ROI_{in\_stent}$ ) and ROIs of the same size (here:  $10\text{mm}^2$ ) in the proximal ( $ROI_{prox}$ ) and distal ( $ROI_{dist}$ ) adjacent coronary vessel. The average Hounsfield Units (HU) are noted and  $\Delta HU_{in\_stent}$  is calculated as follows:

$$\Delta HU_{in\_stent} = ROI_{in\_stent} \text{ HU} - \frac{ROI_{prox} \text{ HU} + ROI_{dist} \text{ HU}}{2} \Rightarrow 371 \text{ HU} - \frac{(358 \text{ HU} + 340 \text{ HU})}{2} = +22 \text{ HU}.$$
